# Supplementary material
Source: bioRxiv or medRxiv preprint supplement (https://medrxiv.org/highwire/filestream/87632/field_highwire_adjunct_files/0/2020.06.26.20138545-1.pdf)
Supplement: Supplementary file [file 2020.06.26.20138545-1.pdf]

# Prevalence of SARS-CoV-2 among workers returning to Bihar gives snapshot of COVID across India

## Supplementary Materials

Anup Malani<sup>1,2†</sup>, Manoj Mohanan<sup>3,4†</sup>, Chanchal Kumar<sup>5</sup>, Jake Kramer<sup>1</sup>, Vaidehi Tandel<sup>6</sup>

**Further background on return of workers to Bihar.** Some workers were able to return to Bihar prior to partial release from the lockdown on May 4, 2020. Some of these were able to return prior to the announcement of the lockdown because they had a hint of what was to come. India's press had announced the growth of cases prior to the lockdown and the government had begun foreign travel bans. Moreover, India announced a voluntary curfew (Janata Curfew) two days before the official lockdown. A relatively small number of workers were able to return to Bihar during the lockdown, even though such travel was prohibited, due to imperfect enforcement.

Prior to May 4, 2020, returning workers were screened and only tested if they were found to be symptomatic (24). In this early set of workers, arriving from Delhi, Punjab, Maharashtra, Kerala, Gujarat, Karnataka and Uttar Pradesh, the positivity rate was 1.16% (58 positives out of 4,991 tests) (24).

During period 1, the Government of Bihar (GOB) sorted workers into 3 categories based on origin state. Workers from Maharashtra, Gujarat, and Delhi were put in what was labelled Group A, those from Haryana, West Bengal, Uttar Pradesh and Tamil Nadu in Group B, and the rest in Group C. While these grouping were based on risk as measured by testing workers returning prior to May 4, these grouping did not affect testing policy.

During period 2, the GOB changed its grouping based on prevalence among workers from different states in period 1. Workers from the National Capital Region (NCR), Mumbai and Pune, Kolkata, and Bangalore were put in Group A, which implied quarantine in government facilities. Remaining workers were put in Group B, which implied home quarantine. During this period, group assignment did affect testing policy, as explained in Methods.

During period 3, the group assignment remained the same as in period 2. Group assignment continued to affect testing policy, though the testing policy changed to include random sampling notwithstanding symptoms in Group B.

Figure S1 below reports the aggregate number of workers returning to Bihar and the number of workers tested during the period of our study.

Figure S1: Number of workers returning to Bihar and the number of returning workers tested by Bihar, by date.

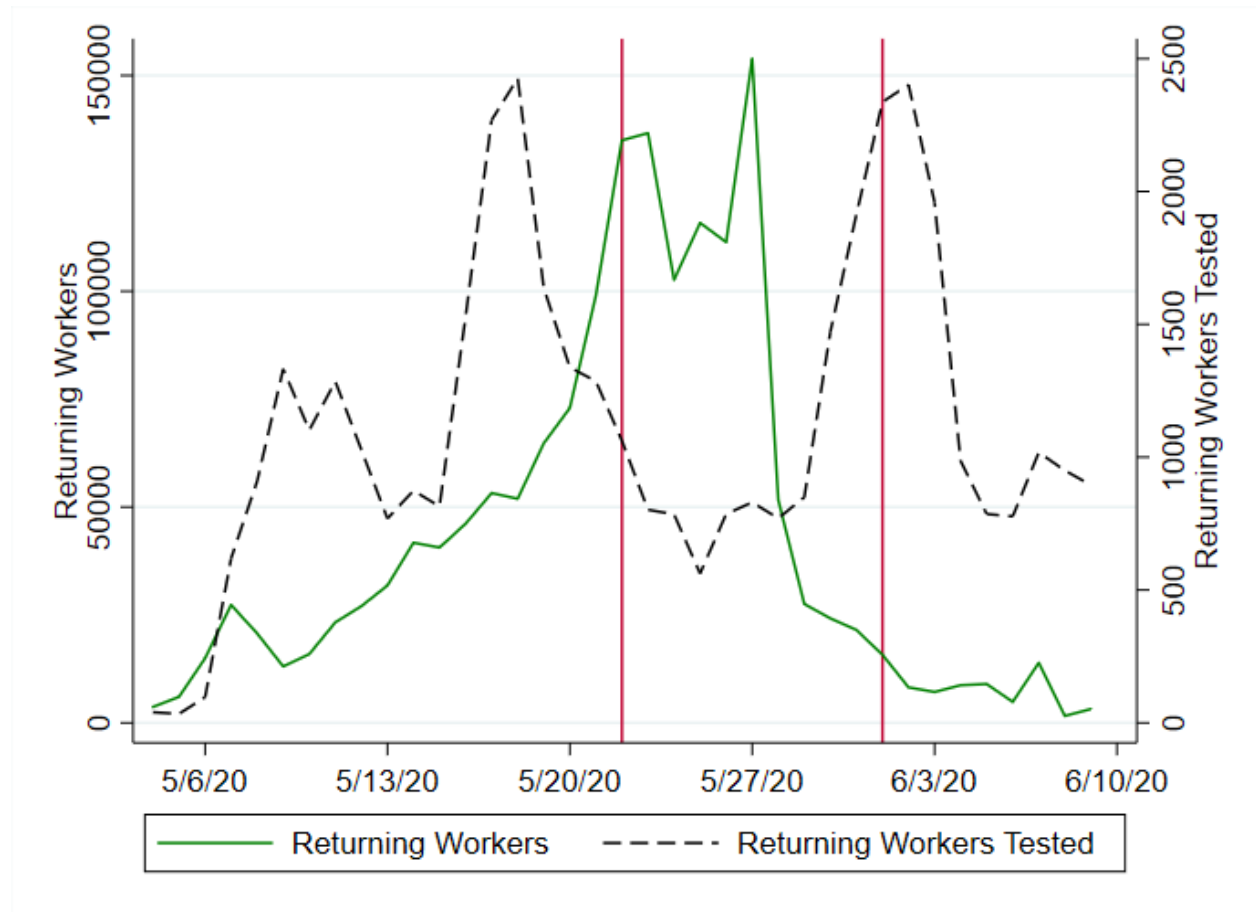

Source: Data from Government of Bihar. Red lines indicate the dates on which one period ends and another starts.

Table S1 presents the number of workers tested by Bihar and the number of residents tested by states, for all states and territories in India and by period. Although Tables 1-4 do not include states and territories from which fewer than 25 workers were tested by Bihar, this Table includes all states and territories of India.

*Table S1. Testing of workers by Bihar and residents by origin states, by state or territory of origin and time period.*

| State                       | State Population | (1) May 4-May 21         |                               |       | (2) May 22-May 31        |                               |       | (3) June 1-June 10       |                               |       |
|-----------------------------|------------------|--------------------------|-------------------------------|-------|--------------------------|-------------------------------|-------|--------------------------|-------------------------------|-------|
|                             |                  | Returning Workers Tested | State Testing Tested in State | Rate  | Returning Workers Tested | State Testing Tested in State | Rate  | Returning Workers Tested | State Testing Tested in State | Rate  |
| Andhra Pradesh              | 52,221,000       | 442                      | 150,475                       | 0.29% | 186                      | 88,629                        | 0.17% | 129                      | 115,401                       | 0.22% |
| Chandigarh                  | 1,179,000        | 179                      | 1,691                         | 0.14% | 98                       | 1,254                         | 0.11% | 55                       | 716                           | 0.06% |
| Chhattisgarh                | 28,724,000       | 212                      | 24,199                        | 0.08% | 25                       | 21,036                        | 0.07% | 34                       | 23,850                        | 0.08% |
| Delhi                       | 19,814,000       | 2,249                    | 90,277                        | 0.46% | 1,579                    | 52,529                        | 0.27% | 2,579                    | 48,619                        | 0.25% |
| Gujarat                     | 67,936,000       | 3,492                    | 81,504                        | 0.12% | 2,185                    | 39,368                        | 0.06% | 2,570                    | 50,146                        | 0.07% |
| Haryana                     | 28,672,000       | 1,461                    | 49,955                        | 0.17% | 748                      | 27,019                        | 0.09% | 1,068                    | 36,691                        | 0.13% |
| Jammu And Kashmir           | 13,203,000       | 26                       | 78,909                        | 0.60% | 44                       | 56,186                        | 0.43% | 63                       | 65,582                        | 0.50% |
| Jharkhand                   | 37,403,000       | 334                      | 28,104                        | 0.08% | 143                      | 21,898                        | 0.06% | 111                      | 26,313                        | 0.07% |
| Karnataka                   | 65,798,000       | 688                      | 95,104                        | 0.14% | 280                      | 107,049                       | 0.16% | 496                      | 103,690                       | 0.16% |
| Madhya Pradesh              | 82,232,000       | 340                      | 73,513                        | 0.09% | 141                      | 38,748                        | 0.05% | 92                       | 56,023                        | 0.07% |
| Maharashtra                 | 122,153,000      | 3,097                    | 151,547                       | 0.12% | 1,728                    | 130,090                       | 0.11% | 2,481                    | 122,938                       | 0.10% |
| Odisha                      | 43,671,000       | 193                      | 67,304                        | 0.15% | 86                       | 38,694                        | 0.09% | 101                      | 29,711                        | 0.07% |
| Punjab                      | 29,859,000       | 1,160                    | 31,073                        | 0.10% | 628                      | 25,453                        | 0.09% | 817                      | 53,354                        | 0.18% |
| Rajasthan                   | 77,264,000       | 1,528                    | 146,716                       | 0.19% | 503                      | 122,613                       | 0.16% | 433                      | 118,128                       | 0.15% |
| Tamil Nadu                  | 75,695,000       | 314                      | 209,562                       | 0.28% | 275                      | 106,777                       | 0.14% | 674                      | 135,507                       | 0.18% |
| Telangana                   | 37,220,000       | 1,247                    | -                             | 0.00% | 235                      | -                             | 0.00% | 158                      | -                             | -     |
| Uttar Pradesh               | 224,979,000      | 1,585                    | 108,511                       | 0.05% | 546                      | 75,832                        | 0.03% | 599                      | 106,734                       | 0.05% |
| Uttarakhand                 | 11,141,000       | 47                       | 8,722                         | 0.08% | 77                       | 12,430                        | 0.11% | 51                       | 9,169                         | 0.08% |
| West Bengal                 | 96,906,000       | 795                      | 90,128                        | 0.09% | 325                      | 83,152                        | 0.09% | 423                      | 84,188                        | 0.09% |
| Subtotal                    | 1,116,070,000    | 19,389                   | 1,487,294                     | 0.13% | 9,832                    | 1,048,757                     | 0.09% | 12,934                   | 1,186,760                     | 0.11% |
| Andaman And Nicobar Islands | 397,000          | -                        | 490                           | 0.12% | -                        | 443                           | 0.11% | 3                        | 2,205                         | 0.56% |
| Arunachal Pradesh           | 1,504,000        | 10                       | 3,569                         | 0.24% | 9                        | 3,439                         | 0.23% | 10                       | 4,267                         | 0.28% |
| Assam                       | 34,293,000       | 69                       | 38,955                        | 0.11% | 24                       | 53,306                        | 0.16% | 42                       | 49,467                        | 0.14% |
| Bihar                       | 119,520,000      | -                        | 27,347                        | 0.02% | -                        | 17,256                        | 0.01% | -                        | 31,393                        | 0.03% |
| Dadra And Nagar Haveli      | 959,000          | 5                        | 4,022                         | 0.42% | 39                       | 2,498                         | 0.26% | 44                       | 5,486                         | 0.57% |
| Goa                         | 1,540,000        | 7                        | 7,960                         | 0.52% | 40                       | 8,129                         | 0.53% | 93                       | 14,552                        | 0.94% |
| Himachal Pradesh            | 7,300,000        | 30                       | 15,211                        | 0.21% | 23                       | 12,922                        | 0.18% | 57                       | 11,025                        | 0.15% |
| Kerala                      | 35,125,000       | 421                      | 20,932                        | 0.06% | 19                       | 19,126                        | 0.05% | 96                       | 48,557                        | 0.14% |
| Ladakh                      | 293,000          | -                        | 2,652                         | 0.91% | -                        | 1,849                         | 0.63% | 1                        | -                             | -     |
| Lakshadweep                 | -                | 2                        | -                             | -     | -                        | -                             | -     | -                        | -                             | -     |
| Manipur                     | 3,103,000        | -                        | 2,516                         | 0.08% | -                        | 4,875                         | 0.16% | 6                        | 7,302                         | 0.24% |
| Meghalaya                   | 3,224,000        | 4                        | 1,535                         | 0.05% | 6                        | 4,099                         | 0.13% | 4                        | 3,378                         | 0.10% |
| Mizoram                     | 1,192,000        | -                        | 137                           | 0.01% | -                        | 453                           | 0.04% | 7                        | 1,851                         | 0.16% |
| Nagaland                    | 2,150,000        | 2                        | 293                           | 0.01% | 4                        | 1,541                         | 0.07% | 7                        | 2,350                         | 0.11% |
| Puducherry                  | 1,504,000        | 4                        | 2,825                         | 0.19% | -                        | 1,022                         | 0.07% | 2                        | 1,600                         | 0.11% |
| Sikkim                      | 664,000          | 5                        | 1,172                         | 0.18% | -                        | 1,288                         | 0.19% | 1                        | 2,636                         | 0.40% |
| Tripura                     | 3,992,000        | 7                        | 11,479                        | 0.29% | 33                       | 9,754                         | 0.24% | 64                       | 11,667                        | 0.29% |
| Total                       | 1,332,830,000    | 19,956                   | 1,628,389                     | 0.12% | 10,029                   | 1,190,757                     | 0.09% | 13,371                   | 1,384,496                     | 0.10% |

*Notes. States and periods for which data on the number of workers are missing are marked as such.*

**Prevalence among returning workers.** Table S2 lists the number of positive tests among workers from each origin state with at least 25 workers tested per period.

*Table S2. Number of positive test results among returning workers, by origin state or territory and period.*

| State             | (1) May 4-May 21           | (2) May 22-May 31          | (3) June 1-June 10         |
|-------------------|----------------------------|----------------------------|----------------------------|
|                   | Returning Worker Positives | Returning Worker Positives | Returning Worker Positives |
| Andhra Pradesh    | 5                          | 11                         | 4                          |
| Chandigarh        | 5                          | 8                          | 3                          |
| Chhattisgarh      | 8                          | 1                          | -                          |
| Delhi             | 299                        | 254                        | 332                        |
| Gujarat           | 201                        | 195                        | 234                        |
| Haryana           | 103                        | 81                         | 129                        |
| Jammu And Kashmir | 2                          | 2                          | 4                          |
| Jharkhand         | 4                          | 6                          | 7                          |
| Karnataka         | 12                         | 21                         | 23                         |
| Madhya Pradesh    | 11                         | 6                          | 3                          |
| Maharashtra       | 297                        | 313                        | 232                        |
| Odisha            | 4                          | 1                          | -                          |
| Punjab            | 24                         | 30                         | 40                         |
| Rajasthan         | 47                         | 25                         | 21                         |
| Tamil Nadu        | 14                         | 19                         | 25                         |
| Telangana         | 59                         | 13                         | 3                          |
| Uttar Pradesh     | 66                         | 79                         | 61                         |
| Uttarakhand       | -                          | 4                          | 1                          |
| West Bengal       | 54                         | 14                         | 16                         |
| <b>Total</b>      | <b>1,215</b>               | <b>1,083</b>               | <b>1,138</b>               |

## Comparison of positive tests among returning workers and state residents.

Table S3. Positive test rate among tests administered by states to their residents and by Bihar to returning workers, by state or territory of origin, for all three periods.

| State             | State-Reported Returning Worker |               | Difference |
|-------------------|---------------------------------|---------------|------------|
|                   | Positive Rate                   | Positive Rate |            |
| Andhra Pradesh    | 0.7%                            | 2.6%          | 2.0%***    |
| Chandigarh        | 5.9%                            | 4.8%          | 1.0%       |
| Chhattisgarh      | 1.6%                            | 3.3%          | 1.7%**     |
| Delhi             | 13.8%                           | 13.8%         | 0.0%       |
| Gujarat           | 8.7%                            | 7.6%          | 1.0%***    |
| Haryana           | 4.1%                            | 9.6%          | 5.5%***    |
| Jammu And Kashmir | 1.8%                            | 6.0%          | 4.2%***    |
| Jharkhand         | 1.6%                            | 2.9%          | 1.3%**     |
| Karnataka         | 1.6%                            | 3.8%          | 2.2%***    |
| Madhya Pradesh    | 4.0%                            | 3.5%          | 0.5%       |
| Maharashtra       | 18.2%                           | 11.5%         | 6.7%***    |
| Odisha            | 2.1%                            | 1.3%          | 0.8%       |
| Punjab            | 1.4%                            | 3.6%          | 2.3%***    |
| Rajasthan         | 2.1%                            | 3.8%          | 1.7%***    |
| Tamil Nadu        | 7.0%                            | 4.6%          | 2.4%***    |
| Telangana         | 0.0%                            | 4.6%          | -          |
| Uttar Pradesh     | 2.9%                            | 7.5%          | 4.7%***    |
| Uttarakhand       | 4.5%                            | 2.9%          | 1.7%       |
| West Bengal       | 3.0%                            | 5.4%          | 2.5%***    |
| Total             | 5.4%                            | 8.2%          | 2.8%***    |

Notes. Asterisks (\*/\*\*/\*\*\*) are used to mark statistical significance (at the 10/5/1% level).

**Selection bias.** While Bihar's weighted allocation of limited tests among any group of returning workers may be orthogonal to disease prevalence, the number of tests allocated to workers from different states may not be. To test this, we examine correlations between the number of tests or the testing rate, on the one hand, and official prevalence or estimate prevalence amongst returning workers, on the other (Table S4).

Evidence on testing levels and prevalence suggests that selection across origin states is not a significant problem. While the *number* of tests administered to returning workers from a state is significantly positively correlated with both the positives rate amongst those workers and the positives rate reported by the origin state, the *rate* of testing of workers from a state is not significantly correlated with those positives rate. Moreover, it is possible that the correlation between the number of tests and the positive rate is a product of more workers fleeing high prevalence states rather than Bihar's testing focusing on high prevalence states.

Table S4. Correlation between testing and prevalence for returning workers tested by Bihar and residents tested in their own states.

|                                   | Returning Workers Tested | Returning Worker Testing Rate | Returning Worker Positive Rate | State-Reported Total Testing | State-Reported Testing Per Capita | State-Reported Positive Rate |
|-----------------------------------|--------------------------|-------------------------------|--------------------------------|------------------------------|-----------------------------------|------------------------------|
| Returning Workers Tested          | 1.00***                  |                               |                                |                              |                                   |                              |
| Returning Worker Testing Rate     | -0.19                    | 1.00***                       |                                |                              |                                   |                              |
| Returning Worker Positive Rate    | 0.79***                  | -0.17                         | 1.00***                        |                              |                                   |                              |
| State-Reported Total Testing      | 0.27                     | -0.01                         | 0.20                           | 1.00***                      |                                   |                              |
| State-Reported Testing Per Capita | -0.01                    | -0.18                         | 0.26                           | 0.30                         | 1.00***                           |                              |
| State-Reported Positive Rate      | 0.77***                  | -0.17                         | 0.79***                        | 0.23                         | 0.05                              | 1.00***                      |

Notes. Asterisks (\*/\*\*/\*\*\*) are used to mark statistical significance (at the 10/5/1% level).

Table S5A addresses the problem that Bihar used a weighting scheme to randomly sample workers but did not digitize the surveys that kept track of the symptoms and demographics of all workers who arrived in Bihar. To address this, the table provides prevalence estimates for 3 groups: symptomatic persons, who were sampled at the highest rate; asymptomatic persons, to see if these workers have a different prevalence; and adult males (defined as adults older than 10 and younger than 65 years).

Table S5A. Prevalence among select subsamples of returning workers, by state or territory or origin and period.

| State             | (1) May 4-May 21          |                            |                          | (2) May 22-May 31         |                            |                          | (3) June 1-June 10        |                            |                          |
|-------------------|---------------------------|----------------------------|--------------------------|---------------------------|----------------------------|--------------------------|---------------------------|----------------------------|--------------------------|
|                   | Symptomatic Positive Rate | Asymptomatic Positive Rate | Adult Male Positive Rate | Symptomatic Positive Rate | Asymptomatic Positive Rate | Adult Male Positive Rate | Symptomatic Positive Rate | Asymptomatic Positive Rate | Adult Male Positive Rate |
| Andhra Pradesh    | 0.0%                      | 1.2%**                     | 1.0%**                   | 20%*                      | 4.7%***                    | 6.7%***                  | 50.0%                     | 2.4%*                      | 3.3%**                   |
| Chandigarh        | 20.0%                     | 2.3%**                     | 3.5%**                   | 0.0%                      | 8.7%***                    | 10.3%***                 | -                         | 5.5%*                      | 7.3%*                    |
| Chhattisgarh      | 7.1%                      | 3.5%***                    | 3.5%***                  | 0.0%                      | 4.2%                       | 4.0%                     | -                         | 0.0%                       | 0.0%                     |
| Delhi             | 15.3%***                  | 13.2%***                   | 14.8%***                 | 25.2%***                  | 15.3%***                   | 17.1%***                 | 12.7%***                  | 12.9%***                   | 13.3%***                 |
| Gujarat           | 9.5%***                   | 5.6%***                    | 6.1%***                  | 10.2%***                  | 8.8%***                    | 10.1%***                 | 9.9%***                   | 9.0%***                    | 9.4%***                  |
| Haryana           | 3.3%*                     | 7.3%***                    | 7.1%***                  | 19.1%***                  | 10.3%***                   | 11.1%***                 | 20.5%***                  | 11.7%***                   | 12.8%***                 |
| Jammu And Kashmir | -                         | 7.7%                       | 9.1%                     | 0.0%                      | 4.9%*                      | 5.1%                     | 100.0%                    | 4.8%*                      | 6.0%*                    |
| Jharkhand         | 0.0%                      | 1.2%**                     | 1.4%**                   | 0.0%                      | 4.3%***                    | 5.1%**                   | 0.0%                      | 6.7%***                    | 3.7%*                    |
| Karnataka         | 0.0%                      | 1.8%***                    | 1.8%***                  | 11.1%*                    | 7.1%***                    | 8.2%***                  | 0.0%                      | 4.8%***                    | 4.7%***                  |
| Madhya Pradesh    | 0.0%                      | 3.4%***                    | 3.3%***                  | 0.0%                      | 4.4%**                     | 4.3%**                   | 0.0%                      | 3.3%*                      | 2.4%                     |
| Maharashtra       | 15.7%***                  | 9.3%***                    | 9.5%***                  | 25.7%***                  | 17.5%***                   | 18.7%***                 | 14.0%***                  | 9.0%***                    | 9.8%***                  |
| Odisha            | 0.0%                      | 2.1%**                     | 2.5%**                   | 0.0%                      | 1.2%                       | 1.4%                     | 0.0%                      | 0.0%                       | 0.0%                     |
| Punjab            | 0.0%                      | 2.2%***                    | 2.0%***                  | 4.0%                      | 4.8%***                    | 5.6%***                  | 10.0%                     | 4.8%***                    | 4.7%***                  |
| Rajasthan         | 2.4%                      | 3.1%***                    | 3.0%***                  | 0.0%                      | 4.9%***                    | 5.4%***                  | 16.7%                     | 4.5%***                    | 4.6%***                  |
| Tamil Nadu        | 5.3%                      | 4.4%***                    | 5.2%***                  | 20.0%                     | 6.4%***                    | 6.8%***                  | 7.1%                      | 3.6%***                    | 3.7%***                  |
| Telangana         | 0.0%                      | 4.8%***                    | 4.9%***                  | 0.0%                      | 5.6%***                    | 6.1%***                  | 0.0%                      | 1.9%**                     | 0.7%                     |
| Uttar Pradesh     | 3.4%*                     | 4.2%***                    | 4.5%***                  | 19.0%***                  | 14.1%***                   | 14.4%***                 | 20.0%**                   | 9.8%***                    | 10.6%***                 |
| Uttarakhand       | 0.0%                      | 0.0%                       | 0.0%                     | 0.0%                      | 5.3%**                     | 5.2%**                   | 0.0%                      | 2.1%                       | 2.0%                     |
| West Bengal       | 13.9%**                   | 6.5%***                    | 6.7%***                  | 12.5%                     | 3.9%***                    | 5.4%***                  | 0.0%                      | 3.9%***                    | 4.4%***                  |
| Total             | 8.4%***                   | 6.2%***                    | 6.5%***                  | 17.4%***                  | 10.6%***                   | 11.8%***                 | 12.4%***                  | 8.6%***                    | 9.0%***                  |

Notes. Only states from which at least 25 returning workers were tested by Bihar in each period are included in this table. Adult male is defined as males above age 10 and below age 65 years. Prevalence is defined as the number of confirmed positive tests divided by the total number of workers tested among the relevant group and during the relevant time period. Asterisks (\*/\*\*/\*\*\*) are used to mark statistical significance (at the 10/5/1% level).

To provide further estimates robust to selection in testing policy, we provide lower bounds in Table S5B. We do not provide corresponding upper bounds: because testing rates are so low, they are largely uninformative.

*Table S5B. Lower bound on positive test rate for returning workers and for residents of states, by state or territory of origin and period.*

| State             | (1) May 4-May 21 |                | (2) May 22-May 31 |                | (3) June 1-June 10 |                |
|-------------------|------------------|----------------|-------------------|----------------|--------------------|----------------|
|                   | Returning Worker | State-Reported | Returning Worker  | State-Reported | Returning Worker   | State-Reported |
|                   | Positive Rate    | Positive Rate  | Positive Rate     | Positive Rate  | Positive Rate      | Positive Rate  |
|                   | Lower Bound      | Lower Bound    | Lower Bound       | Lower Bound    | Lower Bound        | Lower Bound    |
| Andhra Pradesh    | 0.0%             | 0.0%           | 0.1%              | 0.0%           | -                  | 0.0%           |
| Chandigarh        | 0.1%             | 0.0%           | 0.2%              | 0.0%           | -                  | 0.0%           |
| Chhattisgarh      | -                | 0.0%           | -                 | 0.0%           | -                  | 0.0%           |
| Delhi             | 0.5%             | 0.0%           | 0.2%              | 0.0%           | 3.7%               | 0.1%           |
| Gujarat           | 0.2%             | 0.0%           | 0.1%              | 0.0%           | -                  | 0.0%           |
| Haryana           | 0.2%             | 0.0%           | 0.2%              | 0.0%           | 4.9%               | 0.0%           |
| Jammu And Kashmir | -                | 0.0%           | 0.0%              | 0.0%           | -                  | 0.0%           |
| Jharkhand         | -                | 0.0%           | -                 | 0.0%           | -                  | 0.0%           |
| Karnataka         | 0.0%             | 0.0%           | 0.0%              | 0.0%           | 0.1%               | 0.0%           |
| Madhya Pradesh    | 0.4%             | 0.0%           | 0.2%              | 0.0%           | -                  | 0.0%           |
| Maharashtra       | 0.3%             | 0.0%           | 0.2%              | 0.0%           | 7.7%               | 0.0%           |
| Odisha            | -                | 0.0%           | 0.1%              | 0.0%           | -                  | 0.0%           |
| Punjab            | 0.0%             | 0.0%           | 0.0%              | 0.0%           | 0.6%               | 0.0%           |
| Rajasthan         | 0.1%             | 0.0%           | 0.1%              | 0.0%           | 1.3%               | 0.0%           |
| Tamil Nadu        | 0.0%             | 0.0%           | 0.0%              | 0.0%           | 0.1%               | 0.0%           |
| Telangana         | 0.2%             | 0.0%           | 0.1%              | -              | -                  | -              |
| Uttar Pradesh     | 0.1%             | 0.0%           | 0.2%              | 0.0%           | 5.1%               | 0.0%           |
| Uttarakhand       | 0.0%             | 0.0%           | 0.1%              | 0.0%           | 0.0%               | 0.0%           |
| West Bengal       | -                | 0.0%           | -                 | 0.0%           | 0.4%               | 0.0%           |
| Total             | 0.2%             | 0.0%           | 0.1%              | 0.0%           | 1.6%               | 0.0%           |

Notes: Correlation between lower bounds in period (1) is  $\rho = 0.69$  ( $p = 0.01$ ), in period (2) is  $\rho = 0.51$  ( $p = 0.05$ ), and in period (3) is  $\rho = 0.30$  ( $p = 0.4$ ).

**Prevalence across demographic groups.** Raw data for estimates of prevalence by demographic group are presented in Table S6.

*Table S6. Number tested and number of positive results, by demographic group and period.*

| Demographic    | (1) May 4-May 21 |          | (2) May 22-May 31 |          | (3) June 1-June 10 |          |
|----------------|------------------|----------|-------------------|----------|--------------------|----------|
|                | Tested           | Positive | Tested            | Positive | Tested             | Positive |
| Female Adult   | 1,244            | 64       | 985               | 94       | 942                | 82       |
| Female Child   | 469              | 14       | 403               | 18       | 342                | 15       |
| Female Elderly | 15               | -        | 9                 | 2        | 8                  | -        |
| Male Adult     | 16,799           | 1,091    | 7,939             | 934      | 11,066             | 998      |
| Male Child     | 799              | 42       | 460               | 31       | 523                | 35       |
| Male Elderly   | 54               | 4        | 35                | 4        | 52                 | 8        |

The following table gives p-values for comparison of positive rates across each of the 6 demographic groups we study.

*Table S7. P-values for differences in prevalence across demographic groups across all periods.*

|              | Female Adult | Female Child | Male Adult | Male Child |
|--------------|--------------|--------------|------------|------------|
| Female Child | 0.00         |              |            |            |
| Male Adult   | 0.09         | 0.00         |            |            |
| Male Child   | 0.05         | 0.01         | 0.00       |            |
| Male Elderly | 0.10         | 0.00         | 0.22       | 0.01       |
